# Supplementary material
Source: PubMed Central journal article supplement (PMC4085639)
Supplement: mmc1.pdf [file mmc1.pdf]

The American Journal of Human Genetics, Volume 95

Supplemental Data

## **Examining Variation in Recombination Levels in the Human Female: A Test of the Production-Line Hypothesis**

Ross Rowsey, Jennifer Gruhn, Karl W. Broman, Patricia A. Hunt, and Terry Hassold

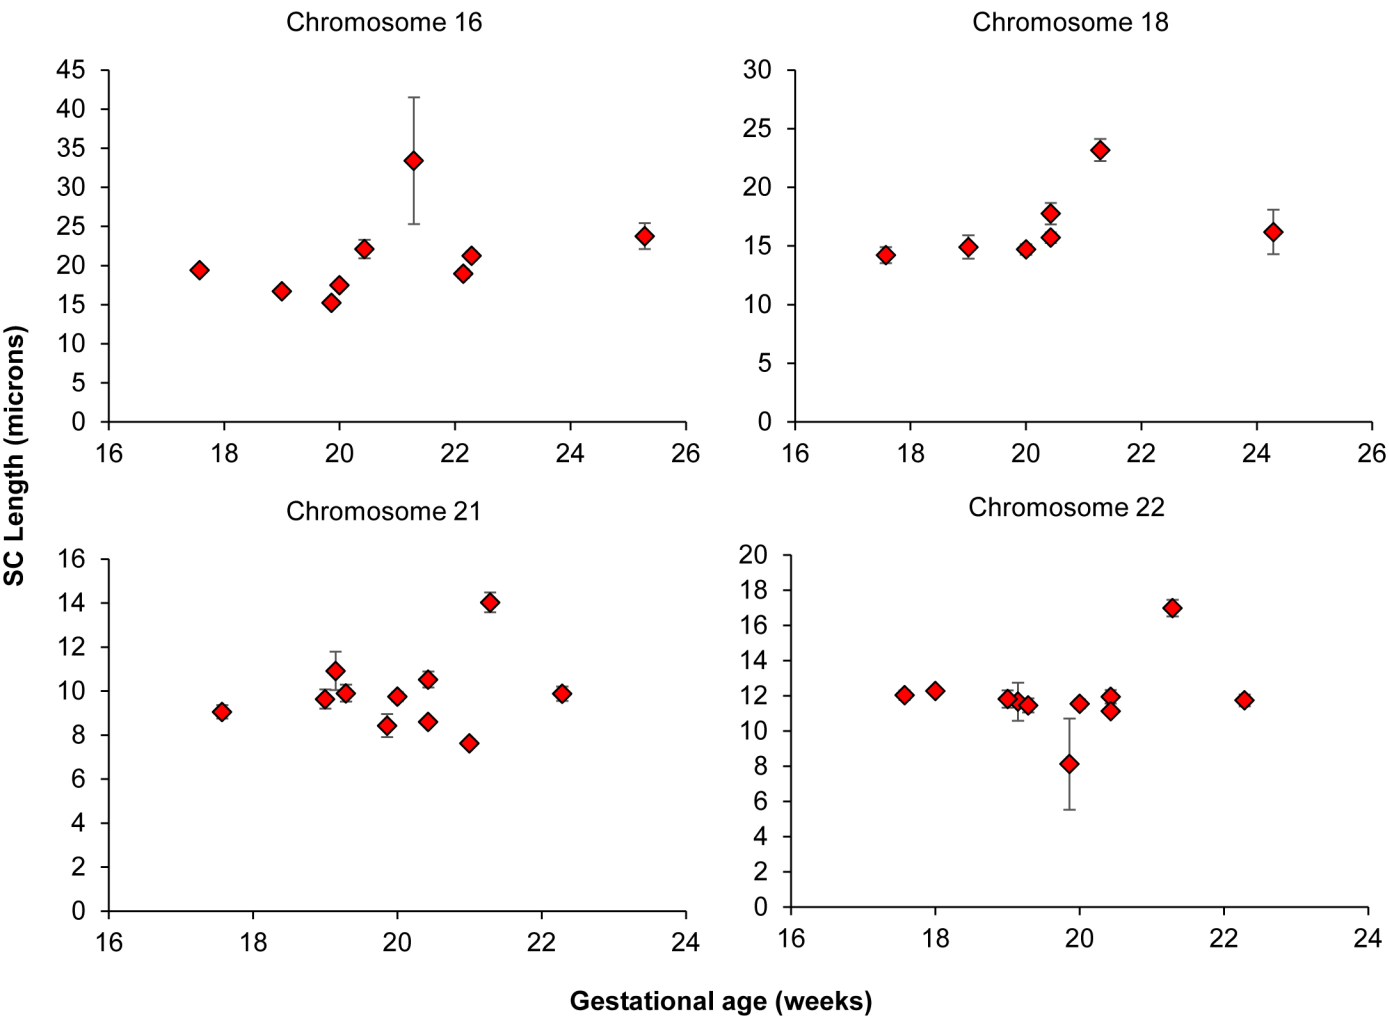

**Figure S1 – Influence of Gestational Age on the Synaptonemal Complex Length of Individual Chromosomes.** For a subset of cases, we analyzed the length of the SC on individual chromosomes; i.e., (A) chromosome 16; no. of cases = 9 (B) chromosome 18, no. of cases = 7 (C) chromosome 21; no. of cases = 11 and (D) chromosome 22; no. of cases = 11. There was no obvious effect of gestational age on the length of the SC on any chromosome. Data points represent means of each analyzed case, and error bars represent SE (points with no error bars represent cases with only one measured SC).
